# Supplementary material for: Systematical Screening of Intracellular Protein Targets of Polyphemusin-I Using Escherichia coli Proteome Microarrays
Source: MDPI journal article supplement (doi:10.3390/ijms22179158), 2021-08-25
Supplement: s1 [file s1]

# Systematical Screening of Intracellular Protein Targets of Polyphemusin-I Using *Escherichia coli* Proteome Microarrays

Pramod Shah <sup>1,2</sup> and Chien-Sheng Chen <sup>1,3,\*</sup>

**Supplementary Table S1.** List of 97 protein targets of Polyphemusin-I identified from the quadruplicate *Escherichia coli* proteome microarrays. The protein ID, uniprot ID, protein names, updated protein ID and the cellular location of each protein in the *Escherichia coli* for the 97 protein targets of Polyphemusin-I are depicted.

| Protein ID | Uniprot ID | Protein names                                       | Updated ID | Cellular location   |
|------------|------------|-----------------------------------------------------|------------|---------------------|
| nrdF       | P37146     | Ribonucleoside-diphosphate reductase 2 subunit beta | nrdF       | cytoplasm           |
| hemL       | P23893     | Glutamate-1-semialdehyde 2,1-aminomutase            | hemL       | cytoplasm           |
| ygfB       | P0A8C4     | UPF0149 protein YgfB                                | ygfB       | Cytosol             |
| nrdB       | P69924     | Ribonucleoside-diphosphate reductase 1 subunit beta | nrdB       | cytoplasm; cytosol  |
| speA       | P21170     | Biosynthetic arginine decarboxylase                 | speA       | Periplasm           |
| amyA       | P26612     | Cytoplasmic alpha-amylase                           | amyA       | cytoplasm           |
| ycaA       | P0AGM5     | UPF0162 protein YcaA                                | ycaA       | N/A                 |
| sseB       | P0AFZ1     | Protein SseB                                        | sseB       | N/A                 |
| polA       | P00582     | DNA polymerase I                                    | polA       | cytoplasm           |
| yggD       | P11663     | Fumarase E                                          | fumE       | N/A                 |
| yqiA       | P0A8Z7     | Esterase YqiA                                       | yqiA       | N/A                 |
| ygjR       | P42599     | Uncharacterized oxidoreductase YgjR                 | ygjR       | N/A                 |
| yciU       | P0A8L7     | UPF0263 protein YciU                                | yciU       | N/A                 |
| purB       | P0AB89     | Adenylosuccinate lyase                              | purB       | Cytosol             |
| ylj        | P0ACA7     | Glutathione S-transferase GstB                      | gstB       | cytosol; cytoplasm  |
| rho        | P0AG30     | Transcription termination factor Rho                | rho        | Cytosol; membrane   |
| yegK       | P76395     | Serine/threonine-protein phosphatase 3              | pphC       | N/A                 |
| ypfI       | P76562     | tRNA(Met) cytidine acetyltransferase TmcA           | tmcA       | cytoplasm           |
| yeeI       | P76346     | Protein MtfA                                        | mtfA       | cytoplasm           |
| rsxC       | P77611     | Ion-translocating oxidoreductase complex subunit C  | rsxC       | Cell inner membrane |
| yegV       | P76419     | Uncharacterized sugar kinase YegV                   | yegV       | N/A                 |
| ydhS       | P77148     | Uncharacterized protein YdhS                        | ydhS       | N/A                 |
| fliH       | P31068     | Flagellar assembly protein FliH                     | fliH       | Cytoplasm           |
| yjiA       | P24203     | P-loop guanosine triphosphatase YjiA                | yjiA       | cytosol; cytoplasm  |
| yfcM       | P76938     | Elongation factor P hydroxylase                     | epmC       | N/A                 |
| rpoN       | P24255     | RNA polymerase sigma-54 factor                      | rpoN       | protein-DNA complex |
| hslO       | P0A6Y5     | 33 kDa chaperonin                                   | hslO       | Cytoplasm           |
| sbcB       | P04995     | Exodeoxyribonuclease I                              | sbcB       | N/A                 |

|      |        |                                                                                        |      |                                              |
|------|--------|----------------------------------------------------------------------------------------|------|----------------------------------------------|
| yihI | P0A8H6 | Der GTPase-activating protein YihI                                                     | yihI | cytosol                                      |
| yrfG | P64636 | GMP/IMP nucleotidase YrfG                                                              | yrfG | cytosol                                      |
| yjgD | P0AF90 | Regulator of ribonuclease activity B                                                   | rraB | cytoplasm                                    |
| ftsK | P46889 | DNA translocase FtsK                                                                   | ftsK | Cell inner membrane                          |
| yihX | P0A8Y3 | Alpha-D-glucose 1-phosphate phosphatase YihX                                           | yihX | N/A                                          |
| hepA | P60240 | RNA polymerase-associated protein RapA                                                 | rapA | cytoplasm                                    |
| parE | P20083 | DNA topoisomerase 4 subunit B                                                          | parE | cytosol                                      |
| tauD | P37610 | Alpha-ketoglutarate-dependent taurine dioxygenase                                      | tauD | cytosol; cytoplasm                           |
| rpsA | P0AG67 | 30S ribosomal protein S1                                                               | rpsA | cytoplasm                                    |
| speE | P09158 | Polyamine aminopropyltransferase                                                       | speE | cytoplasm                                    |
| yeiC | P30235 | Pseudouridine kinase<br>PEP-dependent dihydroxyacetone kinase, phosphoryl              | psuK | N/A                                          |
| dhaM | P37349 | donor subunit DhaM                                                                     | dhaM | cytosol                                      |
| obgE | P42641 | GTPase ObgE/CgtA                                                                       | obgE | cytoplasm                                    |
| ygjF | P0A9H1 | G/U mismatch-specific DNA glycosylase<br>5'-methylthioadenosine/S-adenosylhomocysteine | mug  | cytoplasm                                    |
| pfs  | P0AF12 | nucleosidase                                                                           | mtnN | cytosol                                      |
| ydjJ | P31447 | Uncharacterized sulfatase YidJ                                                         | ydjJ | N/A                                          |
| ygaP | P55734 | Inner membrane protein YgaP                                                            | ygaP | Cell inner membrane<br>Cytoplasm; Cell inner |
| rng  | P0A9J0 | Ribonuclease G                                                                         | rng  | membrane                                     |
| yecA | P0AD05 | Uncharacterized protein YecA                                                           | yecA | N/A                                          |
| ybeX | P0AE78 | Magnesium and cobalt efflux protein CorC                                               | corC | Plasma Membrane                              |
| gadB | P69910 | Glutamate decarboxylase beta                                                           | gadB | Cytoplasm ; Membrane                         |
| yggW | P52062 | Heme chaperone HemW                                                                    | hemW | cytoplasm                                    |
| yjfl | P0AF76 | Uncharacterized protein Yjfl                                                           | yjfl | N/A                                          |
| ung  | P12295 | Uracil-DNA glycosylase                                                                 | ung  | cytoplasm                                    |
| pheT | P07395 | Phenylalanine--tRNA ligase beta subunit                                                | pheT | cytoplasm                                    |
| ydfI | P77260 | Uncharacterized oxidoreductase YdfI                                                    | ydfI | N/A                                          |
| ycdY | P75915 | Chaperone protein YcdY                                                                 | ycdY | cytosol                                      |
| puuA | P78061 | gamma-glutamylputrescine synthetase PuuA                                               | puuA | N/A                                          |
| ade  | P31441 | Adenine deaminase                                                                      | ade  | N/A                                          |
| add  | P22333 | Adenosine deaminase                                                                    | add  | cytosol                                      |
| yaeQ | P0AA97 | Uncharacterized protein YaeQ<br>Uncharacterized zinc-type alcohol dehydrogenase-like   | yaeQ | N/A                                          |
| ydjL | P77539 | protein YdjL                                                                           | ydjL | N/A                                          |
| yegS | P76407 | Lipid kinase YegS                                                                      | yegS | cytoplasm                                    |
| malY | P23256 | Protein MalY                                                                           | malY | N/A                                          |
| ycfX | P75959 | N-acetyl-D-glucosamine kinase                                                          | nagK | N/A                                          |
| rfbB | P37759 | dTDP-glucose 4,6-dehydratase 1                                                         | rfbB | cytosol                                      |
| recE | P15032 | Exodeoxyribonuclease 8                                                                 | recE | N/A                                          |
| hslU | P0A6H5 | ATP-dependent protease ATPase subunit HslU                                             | hslU | cytoplasm                                    |
| yjjK | P0A9W3 | Energy-dependent translational throttle protein EttA                                   | ettA | cytoplasm                                    |

|      |        |                                                         |      |                          |
|------|--------|---------------------------------------------------------|------|--------------------------|
|      |        |                                                         |      | Cytoplasm ; Cell inner   |
| dmsD | P69853 | Tat proofreading chaperone DmsD                         | dmsD | membrane                 |
|      |        |                                                         |      | Cytoplasm ; Cell inner   |
| era  | P06616 | GTPase Era                                              | era  | membrane                 |
| eutJ | P77277 | Ethanolamine utilization protein EutJ                   | eutJ | N/A                      |
| rnd  | P09155 | Ribonuclease D                                          | rnd  | cytoplasm                |
| uxaB | P0A6L7 | Altronate oxidoreductase                                | uxaB | cytosol                  |
| ybiU | P75791 | Uncharacterized protein YbiU                            | ybiU | N/A                      |
| yfjX | P52139 | Uncharacterized protein YfjX                            | yfjX | N/A                      |
| ptsI | P08839 | Phosphoenolpyruvate-protein phosphotransferase          | ptsI | cytoplasm                |
| ispB | P0AD57 | Octaprenyl diphosphate synthase                         | ispB | cytosol                  |
| hyaF | P19932 | Hydrogenase-1 operon protein HyaF                       | hyaF | N/A                      |
| kbl  | P0AB77 | 2-amino-3-ketobutyrate coenzyme A ligase                | kbl  | cytosol; cytoplasm       |
| yghZ | Q46851 | L-glyceraldehyde 3-phosphate reductase                  | gpr  | N/A                      |
| mazG | P0AEY3 | Nucleoside triphosphate pyrophosphohydrolase            | mazG | N/A                      |
|      |        | Probable electron transfer flavoprotein-quinone         |      |                          |
| ydiS | P77337 | oxidoreductase YdiS                                     | ydiS | N/A                      |
| fldA | P61949 | Flavodoxin 1                                            | fldA | cytosol; cytoplasm       |
| fixA | P60566 | Protein FixA                                            | fixA | N/A                      |
| yqcA | P65367 | Flavodoxin YqcA                                         | yqcA | N/A                      |
| thrA | P00561 | Bifunctional aspartokinase/homoserine dehydrogenase 1   | thrA | N/A                      |
| yfbQ | P0A959 | Glutamate-pyruvate aminotransferase AlaA                | alaA | cytoplasm                |
| recB | P08394 | RecBCD enzyme subunit RecB                              | recB | cytosol                  |
| ydiQ | P76201 | Putative electron transfer flavoprotein subunit YdiQ    | ydiQ | N/A                      |
| nadC | P30011 | Nicotinate-nucleotide pyrophosphorylase [carboxylating] | nadC | cytosol; cytoplasm       |
| entF | P11454 | Enterobactin synthase component F                       | entF | cytosol; Plasma Membrane |
| nusA | P0AFF6 | Transcription termination/antitermination protein NusA  | nusA | cytoplasm                |
| yjgM | P39337 | Uncharacterized N-acetyltransferase YjgM                | yjgM | N/A                      |
| dos  | P76129 | Oxygen sensor protein DosP                              | dosP | N/A                      |
| ypfH | P76561 | Esterase YpfH                                           | ypfH | N/A                      |
| ybiT | P0A9U3 | Probable ATP-binding protein YbiT                       | ybiT | N/A                      |
| rnr  | P21499 | Ribonuclease R                                          | rnr  | cytoplasm                |
| fbp  | P0A993 | Fructose-1,6-bisphosphatase class 1                     | fbp  | cytoplasm                |

Supplementary Figure S1

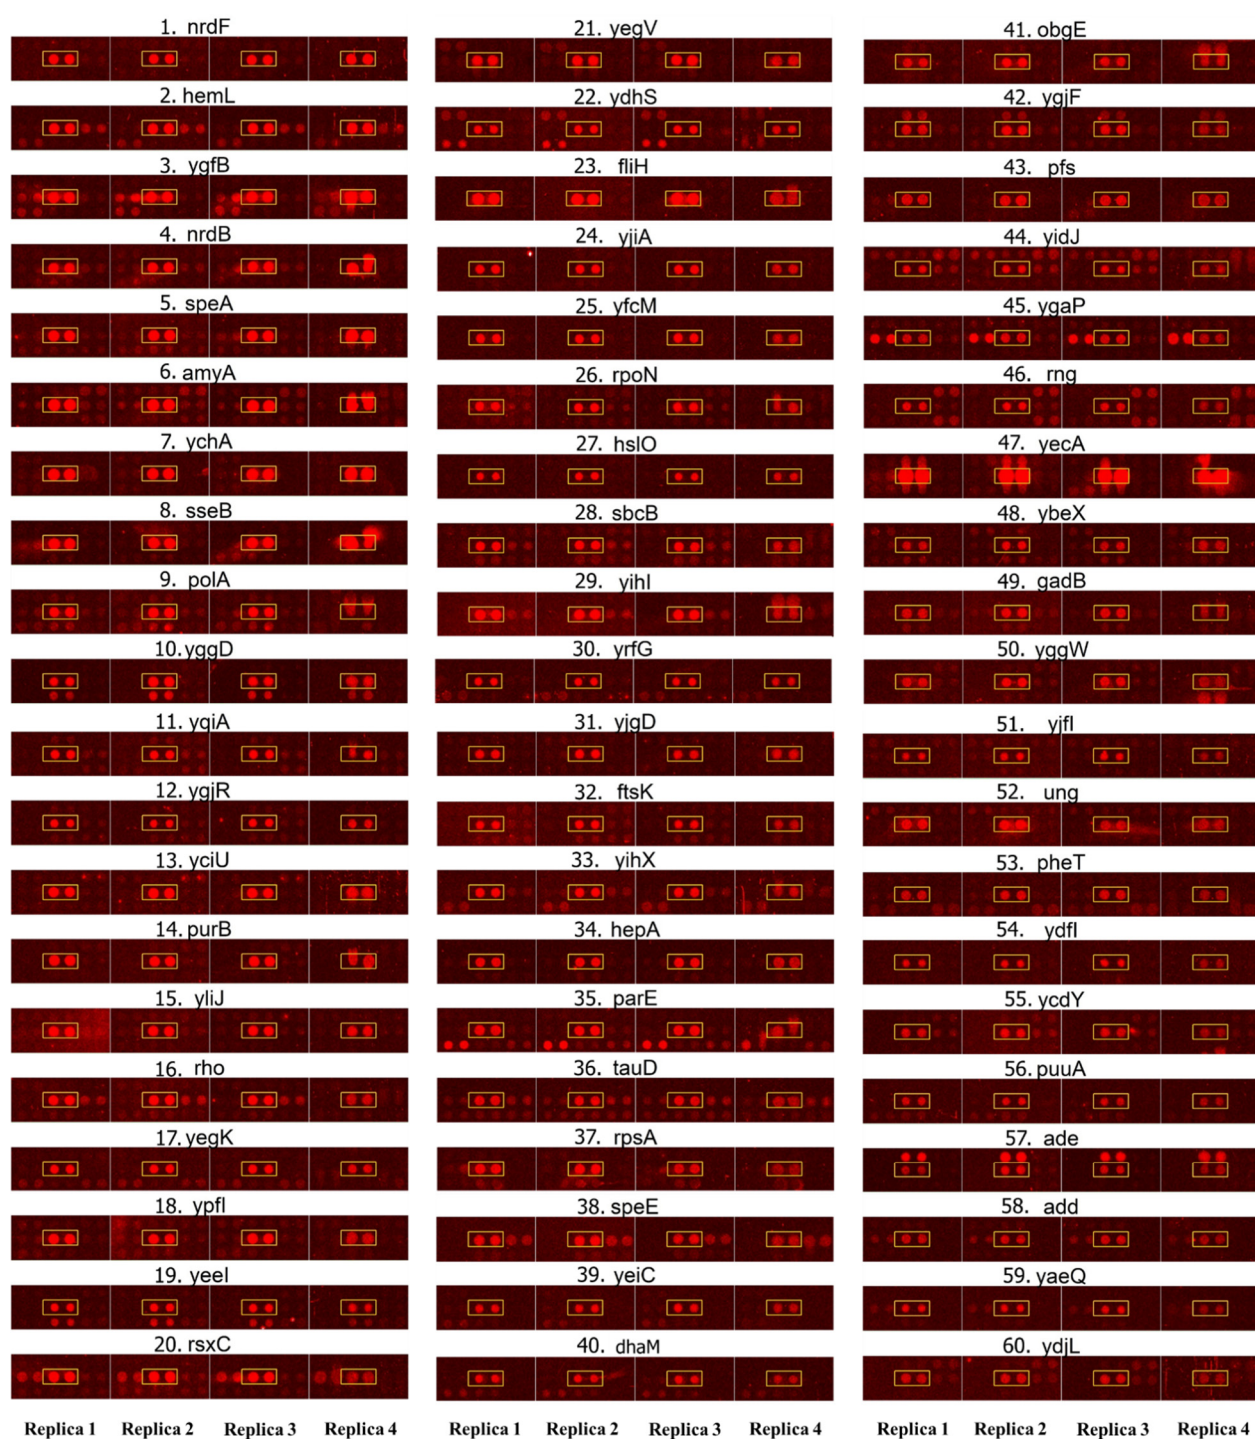

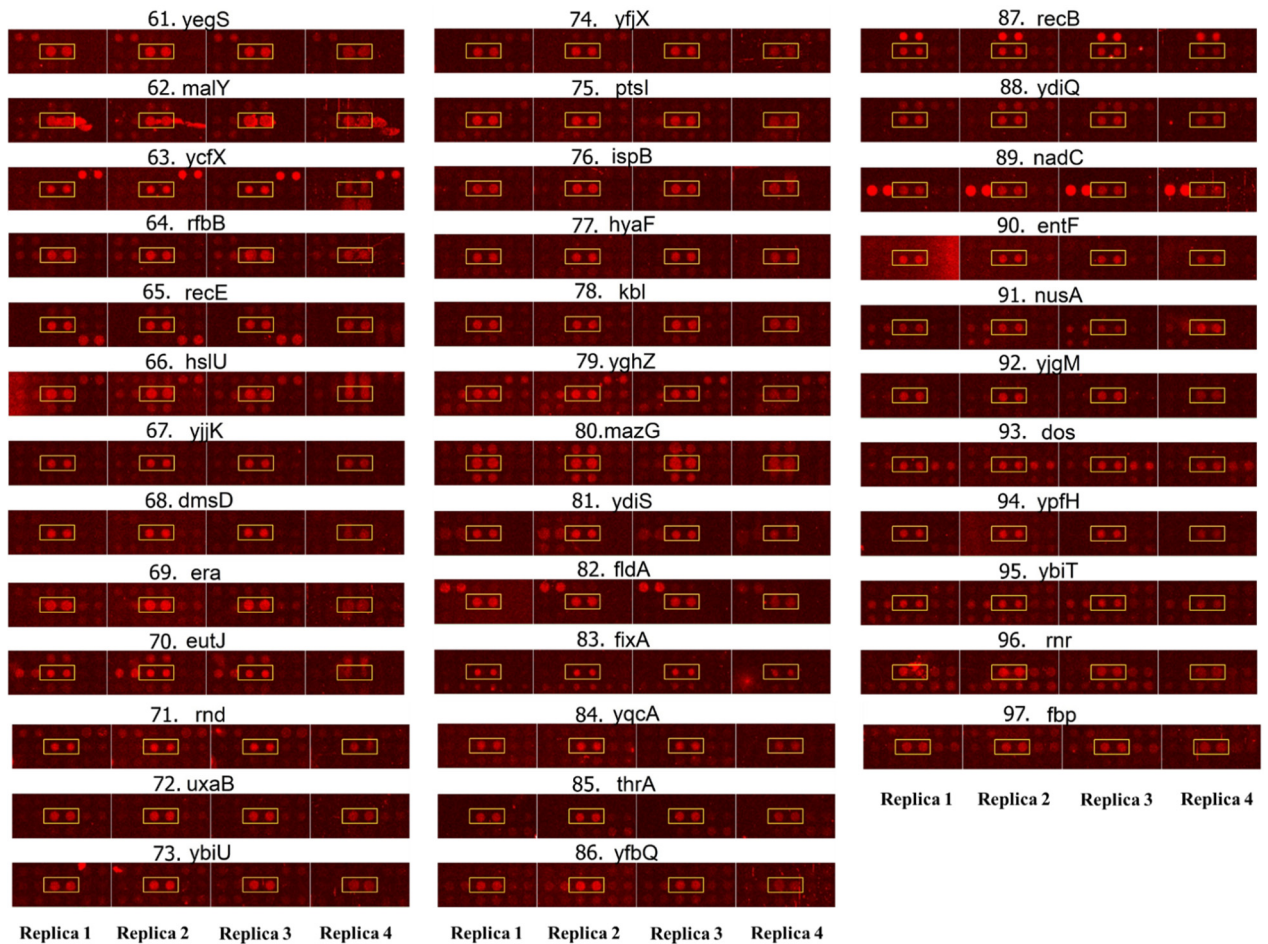

**Supplementary Figure S1. Enlarger images of entire protein targets of Polyphemosin-I identified from quadruplicate *Escherichia coli* proteome microarrays.** Enlarge image of the identified 97 protein targets of Polyphemosin-I on quadruplicate *Escherichia coli* proteome microarrays (right). Each red spot (in duplicate) inside square box represent the individual protein target of Polyphemosin-I identified individually in *Escherichia coli* proteome microarrays, in total of four replicate. (Four replicated assays of *Escherichia coli* proteome microarrays with Polyphemosin-I are represented by replica 1, 2, 3 and 4, respectively).
